# Supplementary material for: Clustering analysis of different hop varieties according to their essential oil composition measured by GC/MS
Source: publisher site journal article supplement (doi:10.1515/chempap-2016-0092), 2016-01-01
Supplement: Supplementary file 1 [file chempap-2016-0092_supplement.docx]

**SUPPLEMENTARY DATA**

Clustering analysis of different hop varieties according to their essential oil composition measured by GC/MS

**aPaulius Kaškonas, bŽydrūnas Stanius, bVilma Kaškonienė, cKęstutis Obelevičius, cOna Ragažinskienė, dAntanas Žilinskas, bAudrius Maruška**

aInstitute of Metrology, Kaunas University of Technology, Studentų str. 50, Kaunas LT-51368, Lithuania

bFaculty of Natural Sciences, Vytautas Magnus University, Vileikos str. 8, Kaunas LT-44404, Lithuania

cKaunas Botanical Garden of Vytautas Magnus University, Ž.E.Žilibero str. 6, Kaunas LT-46324, Lithuania

dInstitute of Mathematics and Informatics, Vilnius University, Akademijos str. 4, Vilnius LT-08663, Lithuania

Corresponding author: Assoc. prof. dr. Vilma Kaškonienė; e-mail: vilma.kaskoniene@vdu.lt; Vytautas Magnus University, Vileikos str. 8, Kaunas LT-44404, Lithuania


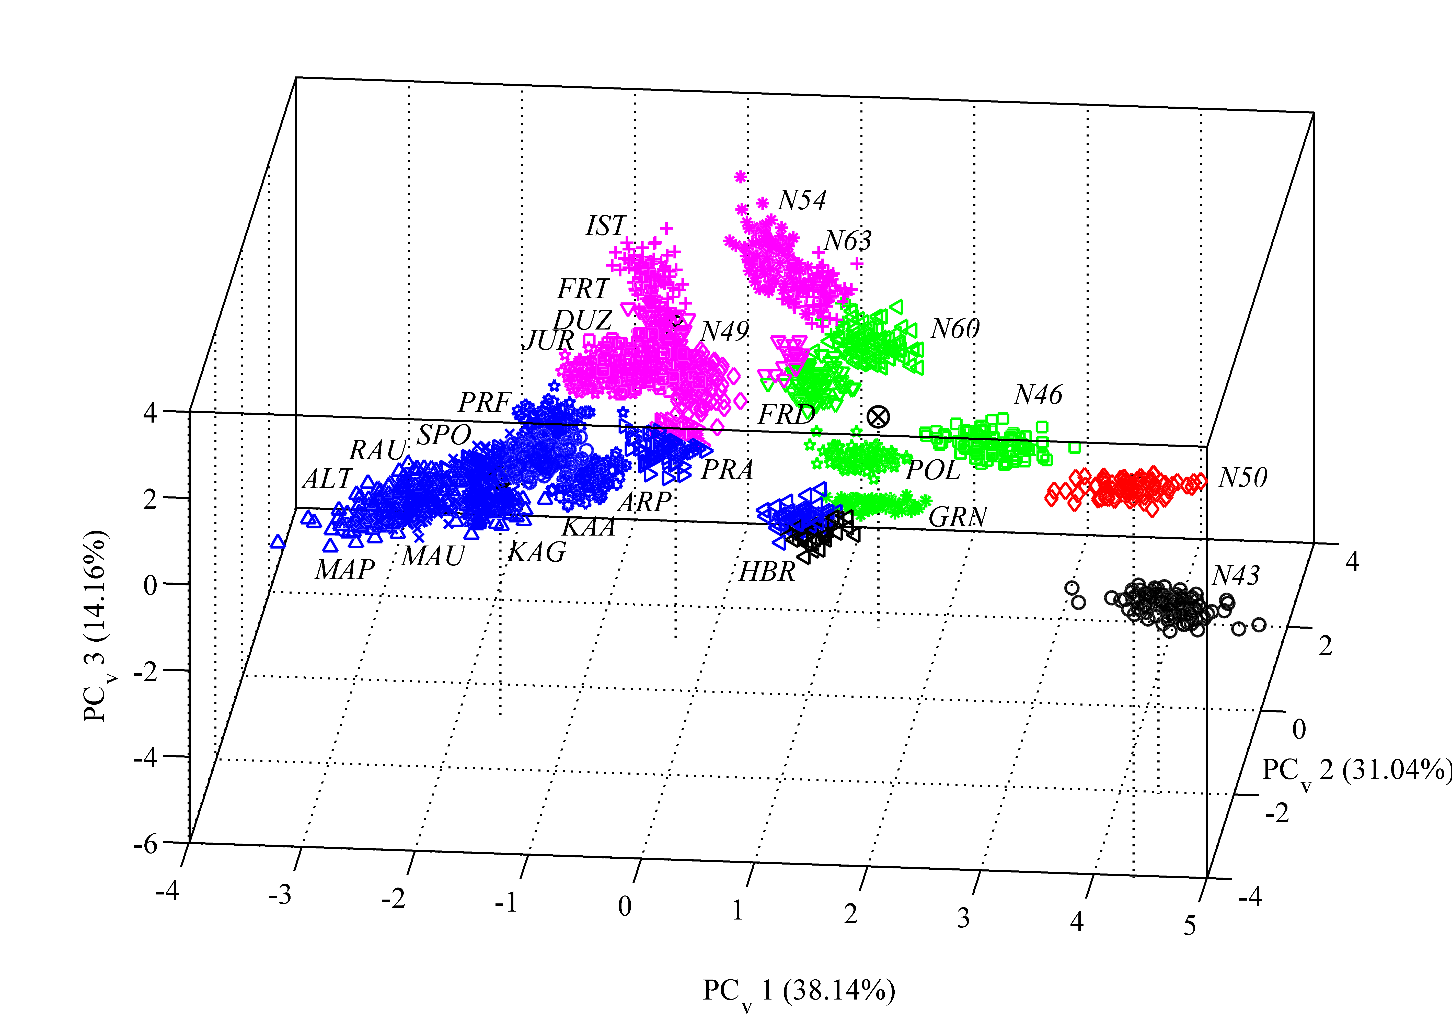


**Fig. S1.** Scatter plot (presented in the space of principal components PCv1-PCv2- PCv3) of tested samples of hops using filtering scenario IF10.


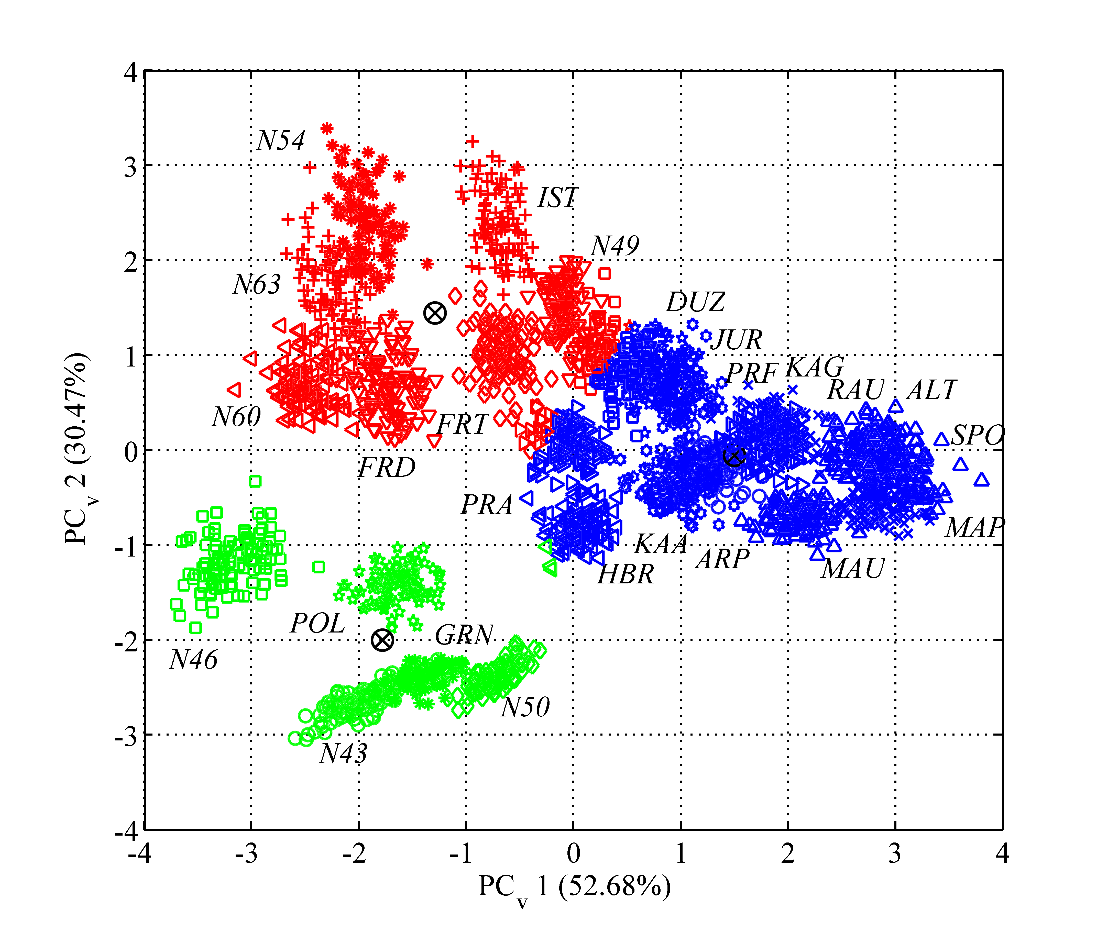


**Fig. S2.** Scatter plot (presented in the plane of principal components PCv1-PCv2) of tested samples of hops using filtering scenario SF5.
